# Supplementary material
Source: HighWire-hosted journal article supplement (https://jmg.bmj.com/content/jmedgenet-2018-105437)
Supplement: inline-supplementary-material-1 [file inline-supplementary-material-1.pdf]

**Supplementary Table S1: Variables defined from the baseline epidemiological self-reported questionnaire of the GCAT cohort**

| Name - Variable            | Description                                                        | Questionnaire - Section         | Type        | Categories - Label                                                                                                                                                                                |
|----------------------------|--------------------------------------------------------------------|---------------------------------|-------------|---------------------------------------------------------------------------------------------------------------------------------------------------------------------------------------------------|
| alcohol_actual             | Current alcohol consumption                                        | Alcohol consumption             | binary      | yes, no                                                                                                                                                                                           |
| bmi                        | BMI (Kg/m <sup>2</sup> )                                           | Anthropometric & blood pressure | numeric     |                                                                                                                                                                                                   |
| bmi_who_obesity            | BMI obesity                                                        | Anthropometric & blood pressure | binary      | <30, ≥30                                                                                                                                                                                          |
| bmi_who                    | BMI WHO categories (Kg/m <sup>2</sup> )                            | Anthropometric & blood pressure | categorical | <18.50, 18.50 - 24.99, ≥25-29.99, ≥30.00                                                                                                                                                          |
| bmi_deep                   | BMI WHO categories; additional cut-off points (Kg/m <sup>2</sup> ) | Anthropometric & blood pressure | categorical | <18.50, 18.50 - 24.99, ≥25-29.99, ≥30-34.99, ≥35-39.99, ≥40                                                                                                                                       |
| diastolic_blood_pressure_c | Diastolic blood pressure                                           | Anthropometric & blood pressure | numeric     |                                                                                                                                                                                                   |
| heart_rate_c               | Heart rate                                                         | Anthropometric & blood pressure | numeric     |                                                                                                                                                                                                   |
| height_c                   | Height                                                             | Anthropometric & blood pressure | numeric     |                                                                                                                                                                                                   |
| hip_c                      | Hip circumference                                                  | Anthropometric & blood pressure | numeric     |                                                                                                                                                                                                   |
| systolic_blood_pressure_c  | Systolic blood pressure                                            | Anthropometric & blood pressure | numeric     |                                                                                                                                                                                                   |
| waist_c                    | Waist circumference                                                | Anthropometric & blood pressure | numeric     |                                                                                                                                                                                                   |
| whr                        | Waist-hip ratio                                                    | Anthropometric & blood pressure | numeric     |                                                                                                                                                                                                   |
| whr_who_obesity            | Waist-hip ratio obesity                                            | Anthropometric & blood pressure | binary      | obesity vs (normalweight, overweight)                                                                                                                                                             |
| whr_who                    | Waist-hip ratio WHO categories                                     | Anthropometric & blood pressure | categorical | normalweight, overweight, obesity                                                                                                                                                                 |
| weight_c                   | Weight                                                             | Anthropometric & blood pressure | numeric     |                                                                                                                                                                                                   |
| civil_status               | Civil status                                                       | Demographic & socioeconomic     | categorical | Single, Married, Widow or widower, Divorced or separated, Domestic partner                                                                                                                        |
| civil_status_ever_divorced | Civil status (ever been divorced)                                  | Demographic & socioeconomic     | binary      | yes, no                                                                                                                                                                                           |
| civil_status_ever_married  | Civil status (ever been married)                                   | Demographic & socioeconomic     | binary      | yes, no                                                                                                                                                                                           |
| education                  | Education level                                                    | Demographic & socioeconomic     | categorical | Without studies, Primary school or equivalent (6thEGB), High school (EGB or ESO), Bachelor Degree (FP1), A levels (BUP), High professional qualifications (FP2), College or University degree     |
| education_college          | Education level (College)                                          | Demographic & socioeconomic     | binary      | College or University degree vs (Without studies, Primary school or equivalent (6thEGB), High school (EGB or ESO), Bachelor Degree (FP1), A levels (BUP), High professional qualifications (FP2)) |
| handedness                 | Handedness                                                         | Demographic & socioeconomic     | categorical |                                                                                                                                                                                                   |
| handedness_left            | Handedness (left)                                                  | Demographic & socioeconomic     | binary      | Left-handedness, Right-handedness, Ambidextrous                                                                                                                                                   |

|                         |                                                                    |                             |             |                                                 |
|-------------------------|--------------------------------------------------------------------|-----------------------------|-------------|-------------------------------------------------|
| lives_alone             | Lives alone                                                        | Demographic & socioeconomic | binary      | yes, no                                         |
| lives_in_couple         | Lives in couple                                                    | Demographic & socioeconomic | binary      | yes, no                                         |
| incapacity              | Socialization                                                      | Demographic & socioeconomic | binary      | yes, no                                         |
| coffee_intake           | Caffeine consumption                                               | Diet                        | binary      | yes, no                                         |
| predimed                | Predimed                                                           | Diet                        | categorical | Low adherence, middle adherence, high adherence |
| predimed_high_adherence | Predimed (high adherence)                                          | Diet                        | binary      | High adherence vs (Low, middle adherence)       |
| predimed_score          | Predimed score                                                     | Diet                        | numeric     |                                                 |
| tea_intake              | Tea consumption                                                    | Diet                        | binary      | yes, no                                         |
| icd9_code3_244          | Acquired hypothyroidism                                            | Medical History             | binary      | yes, no                                         |
| icd9_code3_410          | Acute myocardial infarction                                        | Medical History             | binary      | yes, no                                         |
| icd9_code3_308          | Acute reaction to stress                                           | Medical History             | binary      | yes, no                                         |
| atc_C09                 | Agents acting on the renin-angiotensin system                      | Medical History             | binary      | yes, no                                         |
| atc_N02                 | Analgesics                                                         | Medical History             | binary      | yes, no                                         |
| atc_M01                 | Anti-inflammatory and antirheumatic products                       | Medical History             | binary      | yes, no                                         |
| atc_N04                 | Anti-parkinson drugs                                               | Medical History             | binary      | yes, no                                         |
| atc_B03                 | Antianemic preparations                                            | Medical History             | binary      | yes, no                                         |
| atc_J01                 | Antibacterials for systemic use                                    | Medical History             | binary      | yes, no                                         |
| atc_A07                 | Antidiarrheals, intestinal anti-inflammatory/anti-infective agents | Medical History             | binary      | yes, no                                         |
| atc_N03                 | Antiepileptics                                                     | Medical History             | binary      | yes, no                                         |
| atc_D01                 | Antifungals for dermatological use                                 | Medical History             | binary      | yes, no                                         |
| atc_M04                 | Antigout preparations                                              | Medical History             | binary      | yes, no                                         |
| atc_R06                 | Antihistamines for systemic use                                    | Medical History             | binary      | yes, no                                         |
| atc_C02                 | Antihypertensives                                                  | Medical History             | binary      | yes, no                                         |
| atc_L01                 | Antineoplastic agents                                              | Medical History             | binary      | yes, no                                         |
| atc_D05                 | Antipsoriatics                                                     | Medical History             | binary      | yes, no                                         |
| atc_B01                 | Antithrombotic agents                                              | Medical History             | binary      | yes, no                                         |
| icd9_code3_300          | Anxiety, dissociative and somatoform disorders                     | Medical History             | binary      | yes, no                                         |
| icd9_code3_493          | Asthma                                                             | Medical History             | binary      | yes, no                                         |

|                     |                                                                                |                 |             |                                          |
|---------------------|--------------------------------------------------------------------------------|-----------------|-------------|------------------------------------------|
| icd9_code3_041      | Bacterial infection in conditions classified elsewhere and of unspecified site | Medical History | binary      | yes, no                                  |
| atc_C07             | Beta blocking agents                                                           | Medical History | binary      | yes, no                                  |
| birth_weight        | Birth weight (kg)                                                              | Medical History | categorical | <2.5, 2.5-2.9, 3-3.4, 3.5-4, >4, missing |
| birth_weight_binary | Birth weight (more than 3.5kg)                                                 | Medical History | binary      | <3.5, ≥3.5                               |
| atc_C08             | Calcium channel blockers                                                       | Medical History | binary      | yes, no                                  |
| icd9_code3_427      | Cardiac dysrhythmias                                                           | Medical History | binary      | yes, no                                  |
| atc_C01             | Cardiac therapy                                                                | Medical History | binary      | yes, no                                  |
| atc_M05             | categorical                                                                    | Medical History | binary      | yes, no                                  |
| icd9_code3_995      | Certain adverse effects not elsewhere classified                               | Medical History | binary      | yes, no                                  |
| icd9_code3_496      | Chronic airway obstruction, not elsewhere classified                           | Medical History | binary      | yes, no                                  |
| icd9_code3_571      | Chronic liver disease and cirrhosis                                            | Medical History | binary      | yes, no                                  |
| icd9_code3_472      | Chronic pharyngitis and nasopharyngitis                                        | Medical History | binary      | yes, no                                  |
| icd9_code3_692      | Contact dermatitis and other eczema                                            | Medical History | binary      | yes, no                                  |
| atc_H02             | Corticosteroids for systemic use                                               | Medical History | binary      | yes, no                                  |
| atc_D07             | Corticosteroids, dermatological preparations                                   | Medical History | binary      | yes, no                                  |
| atc_R05             | Cough and cold preparations                                                    | Medical History | binary      | yes, no                                  |
| icd9_code3_311      | Depressive disorder, not elsewhere classified                                  | Medical History | binary      | yes, no                                  |
| icd9_code3_250      | Diabetes mellitus                                                              | Medical History | binary      | yes, no                                  |
| icd9_code3_530      | Diseases of esophagus                                                          | Medical History | binary      | yes, no                                  |
| icd9_code3_536      | Disorders of function of stomach                                               | Medical History | binary      | yes, no                                  |
| icd9_code3_272      | Disorders of lipid metabolism                                                  | Medical History | binary      | yes, no                                  |
| atc_C03             | Diuretics                                                                      | Medical History | binary      | yes, no                                  |
| atc_A02             | Drugs for acid related disorders                                               | Medical History | binary      | yes, no                                  |
| atc_A06             | Drugs for constipation                                                         | Medical History | binary      | yes, no                                  |

|                  |                                                         |                 |        |                                                                                                                                                                                   |
|------------------|---------------------------------------------------------|-----------------|--------|-----------------------------------------------------------------------------------------------------------------------------------------------------------------------------------|
| atc_A03          | Drugs for functional gastrointestinal disorders         | Medical History | binary | yes, no                                                                                                                                                                           |
| atc_R03          | Drugs for obstructive airway diseases                   | Medical History | binary | yes, no                                                                                                                                                                           |
| atc_A10          | Drugs used in diabetes                                  | Medical History | binary | yes, no                                                                                                                                                                           |
| atc_L02          | Endocrine therapy                                       | Medical History | binary | yes, no                                                                                                                                                                           |
| icd9_code3_401   | Essential hypertension                                  | Medical History | binary | yes, no                                                                                                                                                                           |
| icd9_code3_564   | Functional digestive disorders not elsewhere classified | Medical History | binary | yes, no                                                                                                                                                                           |
| icd9_code3_535   | Gastritis and duodenitis                                | Medical History | binary | yes, no                                                                                                                                                                           |
| icd9_code3_780   | General symptoms                                        | Medical History | binary | yes, no                                                                                                                                                                           |
| icd9_code3_V83   | Genetic carrier status                                  | Medical History | binary | yes, no                                                                                                                                                                           |
| icd9_code3_365   | Glaucoma                                                | Medical History | binary | yes, no                                                                                                                                                                           |
| icd9_code3_274   | Gout                                                    | Medical History | binary | yes, no                                                                                                                                                                           |
| offspring_binary | Has children                                            | Medical History | binary | yes, no                                                                                                                                                                           |
| icd9_code3_600   | Hyperplasia of prostate                                 | Medical History | binary | yes, no                                                                                                                                                                           |
| icd9_code3_722   | Intervertebral disc disorders                           | Medical History | binary | yes, no                                                                                                                                                                           |
| icd9_code3_579   | Intestinal malabsorption                                | Medical History | binary | yes, no                                                                                                                                                                           |
| icd9_code3_280   | Iron deficiency anemias                                 | Medical History | binary | yes, no                                                                                                                                                                           |
| atc_C10          | Lipid modifying agents                                  | Medical History | binary | yes, no                                                                                                                                                                           |
| cancer_C43       | Malignant melanoma of skin                              | Medical History | binary | yes, no                                                                                                                                                                           |
| cancer_C54       | Malignant neoplasm of breast                            | Medical History | binary | yes, no                                                                                                                                                                           |
| cancer_C61       | Malignant neoplasm of corpus uteri                      | Medical History | binary | yes, no                                                                                                                                                                           |
| cancer_C50       | Malignant neoplasm of skin                              | Medical History | binary | yes, no                                                                                                                                                                           |
| icd9_code3_199   | Malignant neoplasm without specification of site        | Medical History | binary | yes, no                                                                                                                                                                           |
| icd9_code3_627   | Menopausal and postmenopausal disorders                 | Medical History | binary | yes, no                                                                                                                                                                           |
| anxiety          | Mental Health (MHI-5)                                   | Medical History | binary | Frequency with which he/she has been very nervous during the last 4 weeks from baseline date: 1 (always, almost always, many times), 0 (sometimes, Only ever, never)              |
| calmness         | Mental Health (MHI-5)                                   | Medical History | binary | Frequency with which he/she has been feeling calm and peaceful during the last 4 weeks from baseline date: 1 (always, almost always, many times), 0 (sometimes, Only ever, never) |

|                |                                                                 |                 |         |                                                                                                                                                                                   |
|----------------|-----------------------------------------------------------------|-----------------|---------|-----------------------------------------------------------------------------------------------------------------------------------------------------------------------------------|
| happiness      | Mental Health (MHI-5)                                           | Medical History | binary  | Frequency with which he/she has been feeling happy during the last 4 weeks from baseline date: 1 (always, almost always, many times), 0 (sometimes, Only ever, never)             |
| sadness        | Mental Health (MHI-5)                                           | Medical History | binary  | Frequency with which he/she has been feeling depressed and sad during the last 4 weeks from baseline date: 1 (always, almost always, many times), 0 (sometimes, Only ever, never) |
| upset          | Mental Health (MHI-5)                                           | Medical History | binary  | Frequency with which he/she has been feeling demoralised during the last 4 weeks from baseline date: 1 (always, almost always, many times), 0 (sometimes, Only ever, never)       |
| icd9_code3_346 | Migraine                                                        | Medical History | binary  | yes, no                                                                                                                                                                           |
| atc_A12        | Mineral supplements                                             | Medical History | binary  | yes, no                                                                                                                                                                           |
| atc_R01        | Nasal preparations                                              | Medical History | binary  | yes, no                                                                                                                                                                           |
| offspring      | Number of children                                              | Medical History | numeric |                                                                                                                                                                                   |
| atc_S01        | Ophthalmologicals                                               | Medical History | binary  | yes, no                                                                                                                                                                           |
| icd9_code3_715 | Osteoarthritis and allied disorders                             | Medical History | binary  | yes, no                                                                                                                                                                           |
| cancer_C44     | Other and unspecified                                           | Medical History | binary  | yes, no                                                                                                                                                                           |
| icd9_code3_285 | Other and unspecified anemias                                   | Medical History | binary  | yes, no                                                                                                                                                                           |
| icd9_code3_724 | Other and unspecified disorders of back                         | Medical History | binary  | yes, no                                                                                                                                                                           |
| icd9_code3_719 | Other and unspecified disorders of joint                        | Medical History | binary  | yes, no                                                                                                                                                                           |
| icd9_code3_558 | Other and unspecified noninfectious gastroenteritis and colitis | Medical History | binary  | yes, no                                                                                                                                                                           |
| atc_D11        | Other dermatological preparations                               | Medical History | binary  | yes, no                                                                                                                                                                           |
| icd9_code3_733 | Other disorders of bone and cartilage                           | Medical History | binary  | yes, no                                                                                                                                                                           |
| icd9_code3_459 | Other disorders of circulatory system                           | Medical History | binary  | yes, no                                                                                                                                                                           |
| icd9_code3_569 | Other disorders of intestine                                    | Medical History | binary  | yes, no                                                                                                                                                                           |
| icd9_code3_602 | Other disorders of prostate                                     | Medical History | binary  | yes, no                                                                                                                                                                           |
| icd9_code3_729 | Other disorders of soft tissues                                 | Medical History | binary  | yes, no                                                                                                                                                                           |

|                              |                                                                             |                 |             |                                             |
|------------------------------|-----------------------------------------------------------------------------|-----------------|-------------|---------------------------------------------|
| icd9_code3_246               | Other disorders of thyroid                                                  | Medical History | binary      | yes, no                                     |
| icd9_code3_414               | Other forms of chronic ischemic heart disease                               | Medical History | binary      | yes, no                                     |
| atc_G02                      | Other gynecologicals                                                        | Medical History | binary      | yes, no                                     |
| icd9_code3_339               | Other headache syndromes                                                    | Medical History | binary      | yes, no                                     |
| icd9_code3_553               | Other hernia of abdominal cavity without mention of obstruction or gangrene | Medical History | binary      | yes, no                                     |
| icd9_code3_799               | Other ill-defined and unknown causes of morbidity and mortality             | Medical History | binary      | yes, no                                     |
| atc_N07                      | Other nervous system drugs                                                  | Medical History | binary      | yes, no                                     |
| icd9_code3_338               | Pain, not elsewhere classified                                              | Medical History | binary      | yes, no                                     |
| icd9_code3_696               | Psoriasis and similar disorders                                             | Medical History | binary      | yes, no                                     |
| atc_N06                      | Psychoanaleptics                                                            | Medical History | binary      | yes, no                                     |
| atc_N05                      | Psycholeptics                                                               | Medical History | binary      | yes, no                                     |
| icd9_code3_714               | Rheumatoid arthritis and other inflammatory polyarthropathies               | Medical History | binary      | yes, no                                     |
| icd9_code3_295               | Schizophrenic disorders                                                     | Medical History | binary      | yes, no                                     |
| self_perceived_health        | Self-perceived health                                                       | Medical History | categorical | very good, good, so-so, bad, very bad       |
| self_perceived_health_binary | Self-perceived health (bad)                                                 | Medical History | binary      | (bad, very bad) vs (very good, good, so-so) |
| atc_G03                      | Sex hormones and modulators of the genital system                           | Medical History | binary      | yes, no                                     |
| icd9_code3_785               | Symptoms involving cardiovascular system                                    | Medical History | binary      | yes, no                                     |
| icd9_code3_786               | Symptoms involving respiratory system and other chest symptoms              | Medical History | binary      | yes, no                                     |
| icd9_code3_788               | Symptoms involving urinary system                                           | Medical History | binary      | yes, no                                     |
| atc_H03                      | Thyroid therapy                                                             | Medical History | binary      | yes, no                                     |
| icd9_code3_242               | Thyrotoxicosis with or without goiter                                       | Medical History | binary      | yes, no                                     |
| atc_G04                      | Urologicals                                                                 | Medical History | binary      | yes, no                                     |
| icd9_code3_454               | Varicose veins of lower extremities                                         | Medical History | binary      | yes, no                                     |

|                              |                               |                 |             |                                                                                                                                                                                                                                                                              |
|------------------------------|-------------------------------|-----------------|-------------|------------------------------------------------------------------------------------------------------------------------------------------------------------------------------------------------------------------------------------------------------------------------------|
| atc_C05                      | Vasoprotectives               | Medical History | binary      | yes, no                                                                                                                                                                                                                                                                      |
| atc_A11                      | Vitamins                      | Medical History | binary      | yes, no                                                                                                                                                                                                                                                                      |
| working_shift                | Work shift                    | Occupation      | binary      | yes, no                                                                                                                                                                                                                                                                      |
| working_last_year            | Working last year             | Occupation      | binary      | yes, no                                                                                                                                                                                                                                                                      |
|                              |                               |                 |             | Self-employed without employee, Self-employed with less than 10 employee, Self-employed with more than 10 employee, Other worker, Manager of a company with less than 10 employee, Manager of a company with more than 10 employee, Foreperson, supervisor, person in charge |
| working_status               | Working status                | Occupation      | categorical |                                                                                                                                                                                                                                                                              |
| working_status_active        | Working status (active)       | Occupation      | binary      | yes, no                                                                                                                                                                                                                                                                      |
| ethnic_group_phototype_score | Ethnic group phototype score  | Other habits    | numeric     | 1 (White or caucasian), 4 (Gypsy or Maghrebin), 8 (Latino) , 12 (Black)                                                                                                                                                                                                      |
| eye_color                    | Eye color                     | Other habits    | categorical | black or deep brown, brown, light brown, blue-grey-green, blue-grey-light green                                                                                                                                                                                              |
| eye_color_dark               | Eye color (dark)              | Other habits    | binary      | black or deep brown vs. (brown, light brown, blue-grey-green, blue-grey-light green)                                                                                                                                                                                         |
| eye_color_phototype_score    | Eye color phototype score     | Other habits    | numeric     | 0 (blue-grey-light green), 2 (blue-grey-green), 4 (light brown), 8 (brown), 12 (black or deep brown)                                                                                                                                                                         |
| phototype_score_categorical  | Fitzpratck phototype score    | Other habits    | numeric     | 1 (very sensitive to sunlight), 2 (sensitive to sunlight), 3 (tolerance to sunlight), 4 (dark skin and high tolerance to sunlight), 5 (dark skin and very high tolerance to sunlight)                                                                                        |
| freckling                    | Freckling                     | Other habits    | categorical | abundants, some, a few, occasionals, no                                                                                                                                                                                                                                      |
| freckling_binary             | Freckling (has freckles)      | Other habits    | binary      | yes, no                                                                                                                                                                                                                                                                      |
| freckling_phototype_score    | Freckling phototype score     | Other habits    | numeric     | 0 (Abundant), 4 (Some), 6 (A little), 8 (Occasional)                                                                                                                                                                                                                         |
| hair_color                   | Hair color                    | Other habits    | categorical | black, deep brown, light brown, blond, red                                                                                                                                                                                                                                   |
| hair_color_black             | Hair color (black)            | Other habits    | binary      | black vs (deep brown, light brown, blond, red)                                                                                                                                                                                                                               |
| hair_color_blond             | Hair color (blond)            | Other habits    | binary      | blond vs (black, deep brown, light brown, red)                                                                                                                                                                                                                               |
| hair_color_brown             | Hair color (brown)            | Other habits    | binary      | deep brown vs (black, light brown, blond, red)                                                                                                                                                                                                                               |
| hair_color_light             | Hair color (light)            | Other habits    | binary      | light brown vs (black, deep brown, blond, red)                                                                                                                                                                                                                               |
| hair_color_red               | Hair color (red)              | Other habits    | binary      | red vs (black, deep brown, light brown, blond)                                                                                                                                                                                                                               |
| hair_color_phototype_score   | Hair color phototype score    | Other habits    | numeric     | 0 (Red), 2 (Blond), 4 (Light brown), 8 (Dark brown), 16 (Black)                                                                                                                                                                                                              |
| hair_loss_20                 | Hair loss pattern at 20       | Other habits    | categorical |                                                                                                                                                                                                                                                                              |
| hair_loss_20_binary          | Hair loss pattern at 20 (3&4) | Other habits    | binary      | (1,2) vs (3,4)                                                                                                                                                                                                                                                               |
| hair_loss_30                 | Hair loss pattern at 30       | Other habits    | categorical |                                                                                                                                                                                                                                                                              |

|                                                        |                                                     |                     |             |                                                                                                                                                                                                       |
|--------------------------------------------------------|-----------------------------------------------------|---------------------|-------------|-------------------------------------------------------------------------------------------------------------------------------------------------------------------------------------------------------|
| hair_loss_30_binary                                    | Hair loss pattern at 30 (3&4)                       | Other habits        | binary      | (1,2) vs (3,4)                                                                                                                                                                                        |
| hair_loss_40                                           | Hair loss pattern at 40                             | Other habits        | categorical |                                                                                                                                                                                                       |
| hair_loss_40_binary                                    | Hair loss pattern at 40 (3&4)                       | Other habits        | binary      | (1,2) vs (3,4)                                                                                                                                                                                        |
| phototype_score                                        | Phototype score                                     | Other habits        | numeric     |                                                                                                                                                                                                       |
| skin_color                                             | Skin color                                          | Other habits        | categorical | black, brown, middle, white, very white                                                                                                                                                               |
| skin_color_phototype_score                             | Skin color phototype score                          | Other habits        | numeric     | 0 (Very white), 2 (White), 8 (Median), 12 (Dark skinned), 16 (Black)                                                                                                                                  |
| skin_sensitivity_to_sun                                | Skin sensitivity to sun                             | Other habits        | categorical | easily burn, moderately, some times, rarely, never                                                                                                                                                    |
| skin_sensitivity_to_sun_binary_1_low                   | Skin sensitivity to sun (high to low)               | Other habits        | binary      |                                                                                                                                                                                                       |
| skin_sensitivity_to_sun_binary_12_medium_to_low_medium | Skin sensitivity to sun (high-medium to low-medium) | Other habits        | binary      |                                                                                                                                                                                                       |
| skin_sensitivity_to_sun_binary_12_medium_to_low        | Skin sensitivity to sun (high-medium to low)        | Other habits        | binary      |                                                                                                                                                                                                       |
| skin_sensitivity_to_sun_phototype_score                | Skin sensitivity to sun phototype score             | Other habits        | numeric     | 0 (easily burn), 2 (moderately), 4 (some times), 9 (rarely), 12 (never)                                                                                                                               |
| skin_tanning_without_protection                        | Skin tanning without protection                     | Other habits        | categorical | Never or rarely, Sometimes, Mostly, Always, I never suntan                                                                                                                                            |
| skin_tanning_without_protection_phototype_score        | Skin tanning without protection phototype score     | Other habits        | numeric     | (Never or rarely), 2 (Sometimes), 4 (Mostly), 5 (Always), 8 (I never suntan)                                                                                                                          |
| bedtime                                                | Bed time                                            | Physical Activity   | time        |                                                                                                                                                                                                       |
| morningness                                            | Get up time                                         | Physical Activity   | time        |                                                                                                                                                                                                       |
| nap                                                    | Nap                                                 | Physical Activity   | binary      | yes, no                                                                                                                                                                                               |
| nap_duration                                           | Nap duration                                        | Physical Activity   | numeric     |                                                                                                                                                                                                       |
| sleep_duration                                         | Sleep duration                                      | Physical Activity   | numeric     |                                                                                                                                                                                                       |
| smoking_fagerstrom_score                               | Fagerstrom score                                    | Tobacco consumption | numeric     |                                                                                                                                                                                                       |
| smoking_cesation_time                                  | Smoking cesation time                               | Tobacco consumption | numeric     |                                                                                                                                                                                                       |
| smoking_habit                                          | Smoking habit                                       | Tobacco consumption | categorical | current, former, never                                                                                                                                                                                |
| smoking_intensity                                      | Smoking intensity                                   | Tobacco consumption | categorical | Never, Current-occasionally, Current-unknown, Current: <=15 cig/day, Current: 16-25 cig/day, Current: 26+ cig/day, Former-unknown, Former: quit<=10 yrs, Former: quit 11-20 yrs, Former: quit 20+ yrs |
| smoking_packs                                          | Smoking packs per day                               | Tobacco consumption | numeric     |                                                                                                                                                                                                       |
| smoking_packs_exsmoker                                 | Smoking packs per day (exsmoker)                    | Tobacco consumption | numeric     |                                                                                                                                                                                                       |
| smoking_packs_year                                     | Smoking packs year                                  | Tobacco consumption | numeric     |                                                                                                                                                                                                       |

|                             |                                        |                     |         |         |
|-----------------------------|----------------------------------------|---------------------|---------|---------|
| smoking_packs_year_smoker   | Smoking packs year (current smoker)    | Tobacco consumption | numeric |         |
| smoking_packs_year_exsmoker | Smoking packs year (exsmoker)          | Tobacco consumption | numeric |         |
| smoking_status              | Smoking status (ever smoked)           | Tobacco consumption | binary  | yes, no |
| smoking_time_exsmoker       | Smoking time years (current exsmoker)  | Tobacco consumption | numeric |         |
| smoking_time_smoker         | Smoking time years (current smoker)    | Tobacco consumption | numeric |         |
| smoking_time                | Smoking time years (no current smoker) | Tobacco consumption | numeric |         |
| age_at_fist_birth           | Age at first birth (women)             | Women's Health      | numeric |         |
| age_at_menarche             | Age at menarche (women)                | Women's Health      | numeric |         |
| age_at_menopause            | Age at menopause (women)               | Women's Health      | numeric |         |
| hrt_use                     | Hormone replacement therapy use        | Women's Health      | binary  | yes, no |
| offspring_female            | Number of female children              | Women's Health      | numeric |         |
| offspring_male              | Number of male children                | Women's Health      | numeric |         |
| oc_use                      | Oral contraceptive use                 | Women's Health      | binary  | yes, no |
| reproductive_life_span      | Reproductive life span                 | Women's Health      | numeric |         |
