# Supplementary material
Source: HighWire-hosted journal article supplement (https://jmg.bmj.com/content/jmedgenet-2018-105437)

Figure S6: Locus zoom of the *MAP3K9* locus for univariate and multitrait association of anthropometric traits in GCAT and UK Biobank.

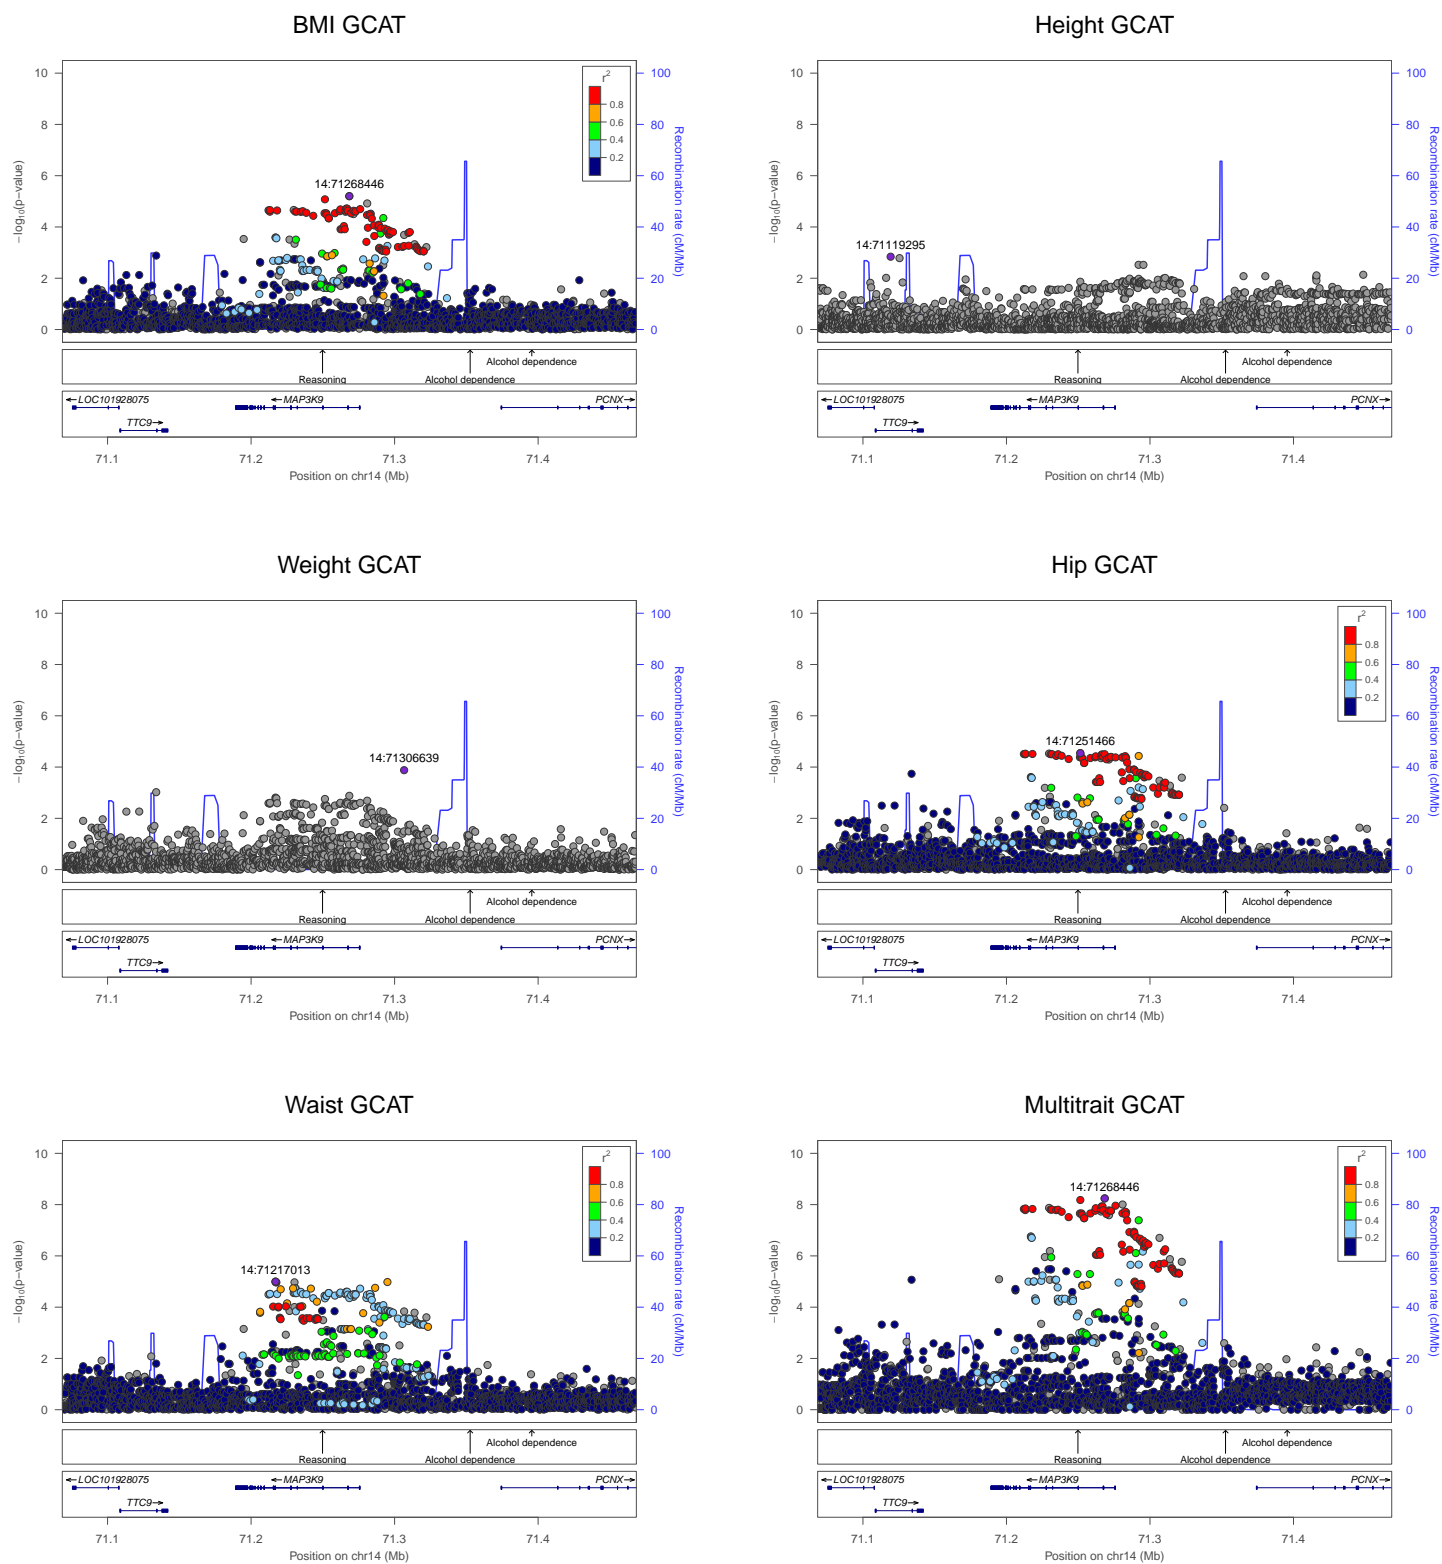

BMI UK Biobank

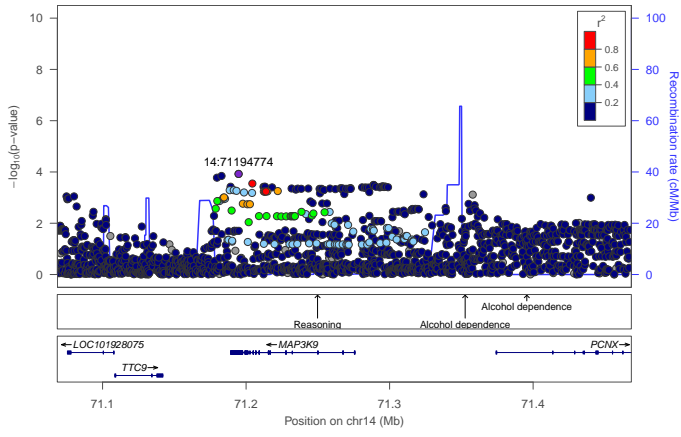

Height UK Biobank

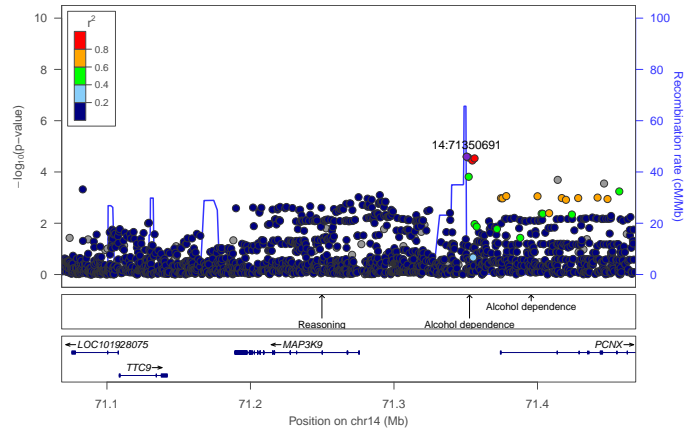

Weight UK Biobank

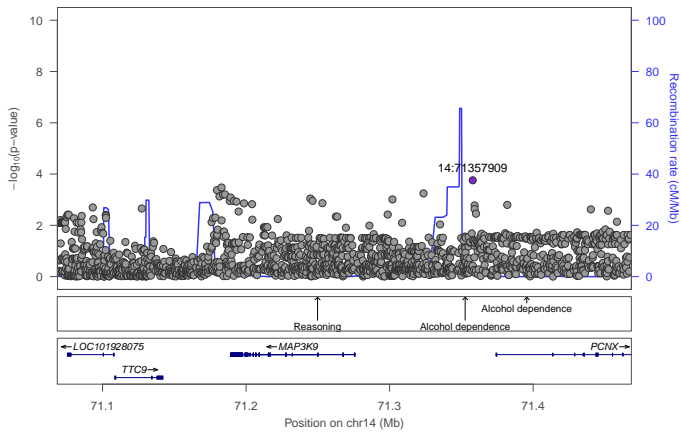

Hip UK Biobank

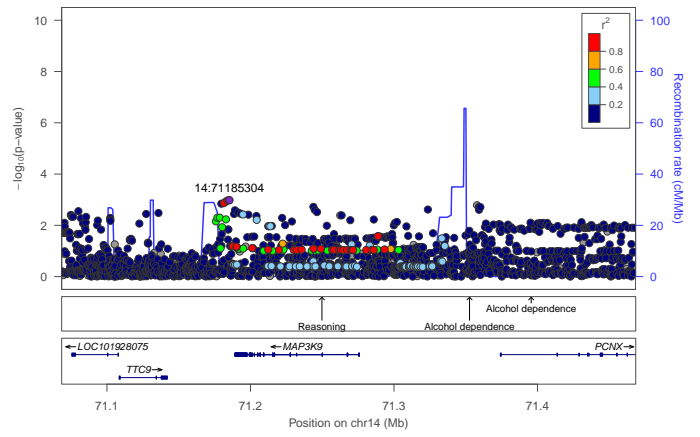

Waist UK Biobank

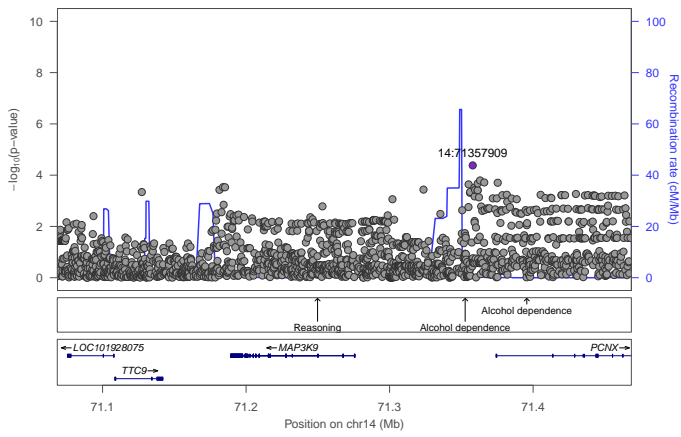

Multitrait UK Biobank

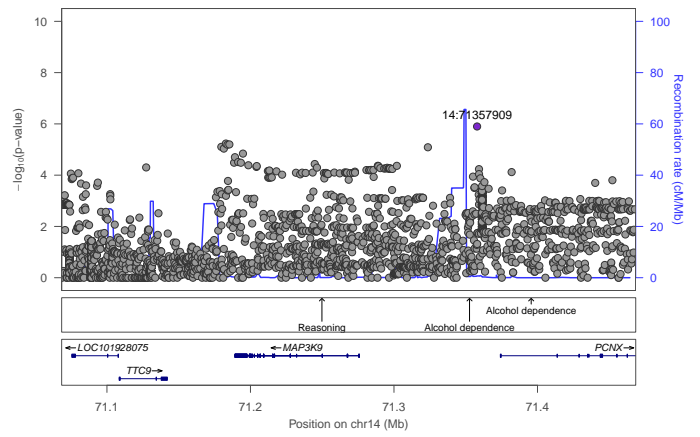

# Multitrait GCAT and UK Biobank

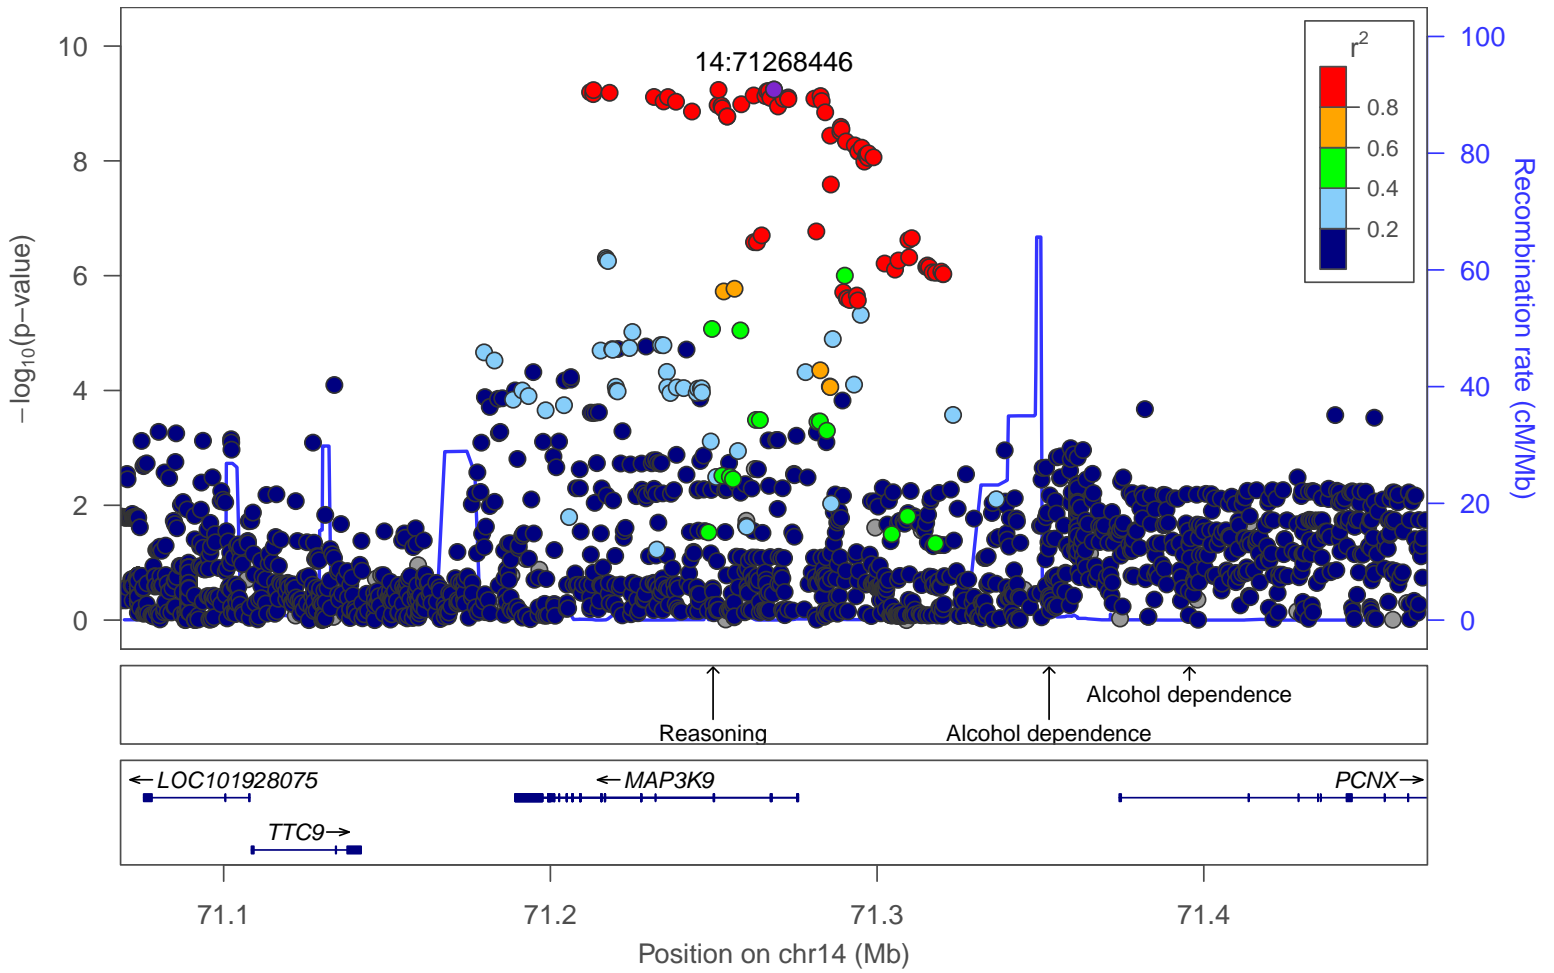

Supplement: inline-supplementary-material-10 [file inline-supplementary-material-10.pdf]
